# Supplementary material for: Personalized computational model quantifies heterogeneity in postprandial responses to oral glucose challenge
Source: PubMed Central journal article supplement (PMC8011733; doi:10.1371/journal.pcbi.1008852), 2021-03-31
Supplement: pcbi.1008852.s010.pdf [file pcbi.1008852.s010.pdf]

# S1 Appendix to Personalized computational model quantifies heterogeneity in postprandial responses to oral glucose challenge

March 8, 2021

## 1 E-DES Model structure

### Glucose in the gut

$$\frac{dM_G^{gut}}{dt} = m_G^{meal}(D^{meal}, t) - m_G^{pl}(M_G^{gut}) \quad (1)$$

$$m_G^{meal} = \sigma k_1^\sigma t^{\sigma-1} \exp(-(k_1 t)^\sigma) D^{meal} \quad (2)$$

$$m_G^{pl} = k_2 M_G^{gut} \quad (3)$$

### Glucose in the plasma

$$\frac{dG^{pl}}{dt} = g^{liv}(G^{pl}, I^{pl}) + g^{gut}(M_G^{gut}) - g^{non-it}(G^{pl}) - g^{it}(G^{pl}, I^{pl}) - g^{ren}(G^{pl}) \quad (4)$$

$$g^{liv} = g_b^{liv} - k_3(G^{pl} - G_b^{pl}) - k_4\beta(I^{pl} - I_b^{pl}) \quad (5)$$

$$g^{gut} = \frac{f}{V_G M^b} m_G^{pl} = k_2 \frac{f}{V_G M^b} M_G^{gut} \quad (6)$$

$$c_2 = g_b^{liv} \left( \frac{K_M + G_b^{pl}}{G_b^{pl}} \right) - k_5\beta I_b^{pl} \quad (7)$$

$$g^{non-it} = c_2 \frac{G^{pl}}{K_M + G^{pl}} \quad (8)$$

$$g^{it} = k_5\beta I^{pl} \frac{G^{pl}}{K_M + G^{pl}} \quad (9)$$

$$g^{ren} = \begin{cases} \frac{c_1}{V_G M^b} (G^{pl} - G_{th}^{pl}), & \text{if } G^{pl} > G_{th}^{pl} \\ 0, & \text{if } G^{pl} \leq G_{th}^{pl} \end{cases} \quad (10)$$

$$\quad (11)$$

### Insulin in the plasma

$$\frac{dI^{pl}}{dt} = i^{pnc}(G^{pl}) - i^{liv}(I^{pl}) - i^{if}(I^{pl}) \quad (12)$$

$$i^{pnc} = \beta^{-1} \left( k_6(G^{pl} - G_b^{pl}) + \left( \frac{k_7}{\tau_i} \right) \int (G^{pl} - G_b^{pl}) dt + \left( \frac{k_7}{\tau_i} \right) G_b^{pl} + (k_8 \tau_d) \frac{dG^{pl}}{dt} \right) \quad (13)$$

$$c_3 = k_7 \frac{G_b^{pl}}{\beta \tau_i I_b^{pl}} \quad (14)$$

$$i^{liv} = c_3 I^{pl} \quad (15)$$

$$i^{if} = k_9(I^{pl} - I_b^{pl}) \quad (16)$$

## 2 E-DES model inputs, fluxes, parameters and constants

Table A: Overview of the E-DES model (input) variables

| Name           | Description                  | Units  |
|----------------|------------------------------|--------|
| $t$            | Time                         | min    |
| $M_G^{gut}(t)$ | Glucose mass in the gut      | mg     |
| $G^{pl}(t)$    | Plasma glucose concentration | mmol/L |
| $I^{pl}(t)$    | Plasma insulin concentration | mU/L   |
| $D^{meal}$     | Glucose intake               | mg     |
| $M^b$          | Body mass                    | kg     |

Glucose intake was set to 75g and body mass was set to 70kg.

Table B: Overview of the E-DES model fluxes

| Name            | Description                                  | Units      |
|-----------------|----------------------------------------------|------------|
| $m_G^{meal}(t)$ | Glucose mass entering from stomach           | mg/min     |
| $m_G^{pl}(t)$   | Glucose mass leaving to plasma               | mg/min     |
| $g^{liv}(t)$    | Glucose production by the liver (EGP)        | mmol/L/min |
| $g^{gut}(t)$    | Glucose entering from the gut                | mmol/L/min |
| $g^{non-it}(t)$ | Glucose uptake by insulin-independent tissue | mmol/L/min |
| $g^{it}(t)$     | Glucose uptake by insulin-dependent tissue   | mmol/L/min |
| $g^{ren}(t)$    | Renal glucose elimination                    | mmol/L/min |
| $i^{pnc}(t)$    | Pancreas insulin secretion                   | mU/L/min   |
| $i^{if}(t)$     | Insulin flowing into interstitial fluid      | mU/L/min   |
| $i^{liv}(t)$    | Insulin uptake by the liver                  | mU/L/min   |

Table C: Overview of the E-DES model parameters

| Name     | Description                                                        | Units  | Value   |
|----------|--------------------------------------------------------------------|--------|---------|
| $k1$     | Rate constant of glucose appearance in the gut                     | 1/min  | 1.35e-2 |
| $k2$     | Rate constant of gut emptying                                      | 1/min  | 6.33e-1 |
| $k3$     | Rate constant of $\Delta G$ suppression of EGP when $G^{pl} > G_b$ | 1/min  | 5.00e-5 |
| $k4$     | Rate constant of insulin-dependent suppression of EGP              | 1/min  | 1.00e-3 |
| $k5$     | Rate constant of insulin-dependent glucose uptake                  | 1/min  | 3.80e-3 |
| $k6$     | Rate constant of $\Delta G$ dependant insulin production           | 1/min  | 5.82e-1 |
| $k7$     | Rate constant of $\int G$ dependant insulin production             | 1/min  | 2.20e-2 |
| $k8$     | Rate constant of $\frac{dG}{dt}$ dependant insulin production      | 1/min  | 4.71    |
| $k9$     | Rate constant of insulin outflow from plasma to interstitial fluid | 1/min  | 1.08e-2 |
| $\sigma$ | Shape factor                                                       | -      | 1.35    |
| $K_M$    | Michaelis-Menten constant for glucose uptake                       | mmol/L | 0.63    |

Table D: Overview of the E-DES model constants

| Name          | Description                                                         | Units           | Value       |
|---------------|---------------------------------------------------------------------|-----------------|-------------|
| $G_b^{pl}$    | Basal plasma glucose                                                | mmol/L          | $G^{pl}(0)$ |
| $I_b^{pl}$    | Basal plasma Insulin                                                | mU/L            | $I^{pl}(0)$ |
| $g_b^{liv}$   | Basal endogenous glucose production                                 | mmol/L/min      | 0.043       |
| $G_{th}^{pl}$ | Renal threshold                                                     | mmol/L          | 9           |
| $V_G$         | Glucose distribution volume in plasma                               | L/kg            | 17/70       |
| $\beta$       | Unit conversion factor from glucose to insulin                      | (mmol/L)/(mU/L) | 1           |
| $f$           | Unit conversion factor from mmol to mg glucose                      | mmol/mg         | 0.005551    |
| $\tau_i$      | Integral time constant                                              | min             | 31          |
| $\tau_d$      | Derivative time constant                                            | min             | 3           |
| $c1$          | Rate constant of glomerular filtration                              | 1/min           | 0.1         |
| $c2$          | Rate constant of glucose uptake by the non-insulin dependent tissue | 1/min           | -           |
| $c3$          | Rate constant of liver insulin clearance                            | 1/min           | -           |

### Model changes from published version

The current model has been adapted from [1]. Changes include:

1. Short and long-acting exogenous insulin inflow, c-peptide, and the parameter accounting for complex carbohydrates were removed in the model.
2. The baseline glucose ( $G_b$ ) and insulin ( $I_b$ ) concentrations were adjusted in model constants c2 and c3 to account for individual values.
3. Parameter k10 was removed in the model.

### References

- [1] Maas, A. (2017). *Playing with numbers: the development of an educational diabetes game*. Technische Universiteit Eindhoven.
