# Supplementary material for: Personalized computational model quantifies heterogeneity in postprandial responses to oral glucose challenge
Source: PubMed Central journal article supplement (PMC8011733; doi:10.1371/journal.pcbi.1008852), 2021-03-31
Supplement: pcbi.1008852.s012.pdf [file pcbi.1008852.s012.pdf]

Table S1: Criteria for prediabetes and diabetes classification based on the standard two hour OGTT by the American Diabetes Association [1]

| Group <sup>1</sup> | fasting plasma glucose | 2hr plasma glucose |
|--------------------|------------------------|--------------------|
| IFG                | 5.6 - 6.9 mmol/L       | -                  |
| IGT                | -                      | 7.8 - 11.0 mmol/L  |
| IFG&IGT            | 5.6 - 6.9 mmol/L       | 7.8 - 11.0 mmol/L  |
| T2DM               | 7.0 mmol/L $\leq$      | 11.1 mmol/L $\leq$ |

<sup>1</sup> IFG: impaired fasting glucose, IGT: impaired glucose tolerant, T2DM: type 2 diabetes mellitus

## References

- [1] American Diabetes Association. 2. Classification and Diagnosis of Diabetes. Diabetes Care. 2015;38(Supplement\_1):S8–S16. doi:10.2337/dc15-S005.
