# Supplementary material for: Personalized computational model quantifies heterogeneity in postprandial responses to oral glucose challenge
Source: PubMed Central journal article supplement (PMC8011733; doi:10.1371/journal.pcbi.1008852), 2021-03-31
Supplement: pcbi.1008852.s013.pdf [file pcbi.1008852.s013.pdf]

Table S2: Sum of squared residuals (SSR) and Akaike Information Criterion (AIC) of the ten best performing candidate models

| Rank | Estimated parameters     | SSR   | AIC   |
|------|--------------------------|-------|-------|
| 1    | $k1, k5, k6, k8$         | 41.39 | 20.44 |
| 2    | $k1, k5, k8, k9$         | 44.46 | 20.94 |
| 3    | $k1, k5, k6, k8, k9$     | 37.02 | 21.66 |
| 4    | $k1, k4, k5, k6, k8$     | 39.15 | 22.05 |
| 5    | $k1, k4, k5, k8, k9$     | 42.57 | 22.64 |
| 6    | $k1, k4, k5, k6, k8, k9$ | 35.20 | 23.31 |
| 7    | $k1, k5, k9$             | 87.00 | 23.64 |
| 8    | $k1, k5, k6$             | 89.75 | 23.86 |
| 9    | $k1, k5, k6, k9$         | 67.94 | 23.91 |
| 10   | $k5, k6, k8$             | 93.84 | 24.17 |
