# Supplementary material for: Personalized computational model quantifies heterogeneity in postprandial responses to oral glucose challenge
Source: PubMed Central journal article supplement (PMC8011733; doi:10.1371/journal.pcbi.1008852), 2021-03-31
Supplement: pcbi.1008852.s017.pdf [file pcbi.1008852.s017.pdf]

**Reproducibility report for:** Individualized computational model quantifies heterogeneity in postprandial responses to oral glucose challenge

**Submitted to:** PLoS Computational Biology

**Manuscript number/identifier:** PCOMPBIOL-D-20-01381R1

**Curation outcome summary:** Successfully reproduced an example plot using the provided model scripts and test data.

#### Box 1: Criteria for repeatability and reproducibility

##### ■ Model source code provided:

- Source code: a standard procedural language is used (e.g. MATLAB, Python, C)
  - There are details/documentation on how the source code was compiled
  - There are details on how to run the code in the provided documentation
  - The initial conditions are provided for each of the simulations
  - Details for creating reported graphical results from the simulation results
- Source code: a declarative language is used (e.g. SBML, CellML, NeuroML)
  - The algorithms used are defined or cited in previous articles
  - The algorithm parameters are defined
  - Post-processing of the results are described in sufficient detail

##### Executable model provided:

- The model is executable without source (e.g. desktop application, compiled code, online service)
  - There are sufficient details to repeat the required simulation experiments

##### ■ The model is described mathematically in the article(s):

- Equations representing the biological system
- There are tables or lists of parameter values
- There are tables or lists of initial conditions
- Machine-readable tables of parameter values
- Machine-readable tables of initial conditions

##### The simulation experiments using the model are described mathematically in the article:

- Integration algorithms used are defined
- Stochastic algorithms used are defined
- Random number generator algorithms used are defined
- Parameter fitting algorithms are defined
- The paper indicates how the algorithms yield the desired output

**Box 2: Criteria for accessibility**

- Model/source code is available at a public repository or researcher's web site
  - Prohibitive license provided
  - Permissive license provided
  - Open-source license provided
- All initial conditions and parameters are provided
- All simulation experiments are fully defined (events listed, collection times and measurements specified, algorithms provided, simulator specified, etc.)

**Box 3: Rules for Credible practice of Modeling and Simulation<sup>a</sup>**

<sup>a</sup>Model credibility is assessed using the Interagency Modeling and Analysis Group conformance rubric:  
<https://www.imagwiki.nibib.nih.gov/content/10-simple-rules-conformance-rubric>

- Define context clearly: Extensive
- Use appropriate data: Extensive
- Evaluate within context: Extensive
- List limitations explicitly: Adequate
- Use version control: Insufficient
- Document adequately: Extensive
- Conform to standards: Insufficient

**Box 4: Evaluation**

- Model and its simulations could be repeated using provided declarative or procedural code
- Model and its simulations could be reproduced

**Summary comments:** Model source code were made available for download as an attachment provided with the manuscript. These were used in our attempt to reproduce the results presented in the paper. We successfully ran the Matlab scripts provided to reproduce the example figure as shown. Due to ethical restrictions and privacy of participant data, we were unable to reproduce the results presented in this manuscript, however this should not limit the reuse of the models produced in this paper.



Anand K. Rampadarath<sup>1</sup>, PhD  
Curator  
Center for Reproducible Biomedical Modeling



David P. Nickerson, PhD  
Curation Service Director  
Center for Reproducible Biomedical Modeling

Auckland Bioengineering Institute,  
University of Auckland

---

<sup>1</sup>Email: [a.rampadarath@auckland.ac.nz](mailto:a.rampadarath@auckland.ac.nz)
